# Supplementary material for: A Glossary for Chemical Approaches towards Unlocking the Trove of Metabolic Treasures in Actinomycetes
Source: MDPI journal article supplement (doi:10.3390/molecules27010142), 2021-12-27
Supplement: s1 [file s1]

## **(Molecules)** Featured Reviews in Natural Products Chemistry

**A glossary for chemical approaches towards unlocking the trove of metabolic treasures in *Actinomyces***

**Jianye Zhang <sup>1</sup>, Heba Ali Hassan <sup>2,\*</sup>, Usama Ramadan Abdelmohsen <sup>3,4,\*</sup> and Eman Maher Zahran <sup>4,\*</sup>**

Key Laboratory of Molecular Target & Clinical Pharmacology and the State & NMPA Key Laboratory of Respiratory Disease, School of Pharmaceutical Sciences & the Fifth Affiliated Hospital, Guangzhou Medical University, Guangzhou 511436, China; jianyez@163.com

<sup>2</sup> Department of Pharmacognosy, Faculty of Pharmacy, Sohag University, Sohag 82524, Egypt; heba.ali@pharm.sohag.edu.eg

<sup>3</sup> Department of Pharmacognosy, Faculty of Pharmacy, Minia University, Minia 61519, Egypt

<sup>4</sup> Department of Pharmacognosy, Faculty of Pharmacy, Deraia University, Universities Zone, New Minia City 61111, Minia, Egypt

\* Correspondence: usama.ramadan@mu.edu.eg (U.R.A.); emanzahran84@yahoo.com (E.M.Z.)

**\*Corresponding authors: emanzahran84@yahoo.com, Usama.ramadan@mu.edu.eg, heba.ali@pharm.sohag.edu.eg**

**Table S1.** Secondary metabolites detected from different classes of elicitors

| Studied genera                         | Chemical elicitor                         | Produced SMs                 | Classification | Reference |
|----------------------------------------|-------------------------------------------|------------------------------|----------------|-----------|
| <b>Antibiotics</b>                     |                                           |                              |                |           |
| Marine <i>Streptomyces</i> spp         | Bacitracin, tetracycline                  | Streptophenazines E-H        | Elicited       | [1]       |
| Marine <i>Streptomyces</i> spp         | Tetracycline                              | Streptophenazines A-D        | Enhanced       | [1]       |
| <i>S. griseorubiginosus</i> strain 574 | Monensin 1                                | Isonitrile antibiotic SF2768 | Elicited       | [2]       |
| <i>S. griseus</i>                      | Lincomycin                                | streptomycin                 | Enhanced       | [2]       |
| <i>S. lividans</i>                     | Lincomycin                                | ACT                          | Enhanced       | [3]       |
| <i>Streptomyces</i> Spp                | Chloramphenicol                           | ACT, CDA and piperidamycin   | Enhanced       | [4]       |
| <i>S. coelicolor</i> M145              | Thiosteptone, spectinomycin               | RED                          | Enhanced       | [5]       |
| <i>S. venezuelae</i>                   | Jadomycin B                               | Jadomycin B                  | Enhanced       | [6]       |
| <i>S. venezuelae</i>                   | RED                                       | RED                          | Enhanced       | [7]       |
| <i>S. venezuelae</i> ISP5230           | DHU and DHR                               | Jadomycin B                  | Enhanced       | [7]       |
| <i>S. antibioticus</i>                 | Chlorothricin, and 2 intermediates        | Chlorothricin                | Enhanced       | [8]       |
| <i>S. chartreusis</i>                  | Calcimycin                                | Calcimycin                   | Enhanced       | [8]       |
| <i>S. actuosus</i>                     | Nosiheptide                               | Nosiheptide                  | Enhanced       | [9]       |
| <i>Amycolatopsis mediterranei</i> ,    | Rifamycin B                               | Rifamycin B                  | Enhanced       | [9]       |
| <i>S. venezuelae</i>                   | JdB                                       | JdB                          | Enhanced       | [10]      |
| <i>S. avermitilis</i>                  | Avenolide                                 | Avermectin                   | Enhanced       | [10]      |
| <i>S. avermitilis</i>                  | JdB apramycin, hygromycin B and kanamycin | avermectin                   | Enhanced       | [10]      |

|                                                           |                      |                                                            |          |      |
|-----------------------------------------------------------|----------------------|------------------------------------------------------------|----------|------|
| <i>S. coelicolor</i>                                      | RED                  | RED, ACT, CDA                                              | Enhanced | [10] |
| <i>S. albidoflavus</i> S4                                 | Candididin           | Candididin, antimycin                                      | Enhanced | [11] |
| <i>S. venezuelae</i>                                      | Jadomycin            | Jadomycin, chloramphenicol                                 | Enhanced | [7]  |
| <i>S. autolyticus</i> CGMCC0516                           | Geldanamycin         | Geldanamycin Elaiophylin                                   | Enhanced | [12] |
| <i>Streptomyces</i> Spp                                   | ARC2                 | Erythromycin oligomycin, monensin B, and ACT               | Enhanced | [13] |
| <i>S. coelicolor</i>                                      | ARC2                 | Germicidins A-C                                            | Enhanced | [13] |
| <i>S. pristinaespiralis</i> ,                             | ARC2                 | Desferrioxamine B/E in                                     | Enhanced | [14] |
| <i>S. peucetius</i>                                       | ARC2                 | Doxorubicin, baumycin                                      | Enhanced | [14] |
| <i>S. coelicolor</i>                                      | ARC6                 | ACT                                                        | Enhanced | [14] |
| <i>S. ghanaensis</i> ATCC 14672,                          | CI-ARC 1             | Oxohygrolidin                                              | Elicited | [15] |
| <i>S. hygroscopicus</i> ATCC 53653                        | CI-ARC 1             | 9-methylstreptimidone                                      | Elicited | [16] |
| WAC0256                                                   | CI-ARC 1             | Dynactin,                                                  | Elicited | [17] |
| WAC0256                                                   | CI-ARC 1             | Nonactin, monactin, trinactin                              | Enhanced | [17] |
| <b>Histone deacetylase inhibitors</b>                     |                      |                                                            |          |      |
| <i>S. coelicolor</i> A3 strain M145                       | Sodium-butyrate, VPA | ACT                                                        | Enhanced | [18] |
| <b>Hormone-like signalling molecules (autoregulators)</b> |                      |                                                            |          |      |
| <i>S. coelicolor</i>                                      | A-factor             | Streptomycin, virginamycin, Valinomycin and methylenomycin | Enhanced | [19] |
| <i>S. coelicolor</i>                                      | 1,4-butyrolactone    | Bitespiramycin and validamycin A                           | Enhanced | [20] |
| <i>S. virginiae</i>                                       | Butanolide-C         | Virginiamycin                                              | Enhanced | [21] |
| <i>Streptomyces</i> FRI-5                                 | IM-2                 | Showdomycin, Minimycin                                     | Enhanced | [22] |
| <i>S. coelicolor</i>                                      | MMF                  | Methylenomycin A                                           | Enhanced | [21] |

|                                                             |                          |                                                           |          |      |
|-------------------------------------------------------------|--------------------------|-----------------------------------------------------------|----------|------|
| <i>S. viridochromogenes</i>                                 | factor 1                 | Anthracycline                                             | Enhanced | [21] |
| <i>S. bikiniensis</i> ,<br><i>S. cyaneofuscatus</i>         | Grafe's                  | Anthracycline                                             | Enhanced | [21] |
| <i>S. coelicolor</i>                                        | 7ae 1                    | ACT                                                       | Elicited | [19] |
| <i>S. coelicolor</i>                                        | Hydroxymethylfuran       | Methylenomycin                                            | Enhanced | [19] |
| <i>S. avermitilis</i>                                       | <u>Avenolide</u>         | Avermectin                                                | Enhanced | [23] |
| <i>S. avermitilis</i>                                       | <u>SCB2</u>              | Avenolide                                                 | Elicited | [23] |
| <i>S. coelicolor</i>                                        | SCB1                     | ACT                                                       | Enhanced | [24] |
| <i>S. coelicolor</i> M1152                                  | SCB1–3, SCB4–8           | Coelimycin                                                | Enhanced | [25] |
| <i>S. natalensis</i>                                        | PI factor                | Pimaricin                                                 | Enhanced | [26] |
| <i>S. globisporus</i> 1912-B2<br>and <i>S. griseus</i> 1439 | MDD 2                    | Landomycin E and streptomycin                             | Elicited | [26] |
| <b>Chemical signals</b>                                     |                          |                                                           |          |      |
| <i>Micromonospora</i> sp. RV43                              | GlcNAc                   | 3-formylindole, guaymasol                                 | Enhanced | [27] |
| <i>Rhodococcus</i> sp. RV157                                |                          | Bacillibactin, surfactin Lipopeptide 17                   | Enhanced | [27] |
| <i>Actinokineospora</i> sp. EG49                            | GlcNAc                   | Actinosporins E-H                                         | Elicited | [28] |
| <i>Actinokineospora</i><br><i>spheciospongiae</i>           | GlcNAc                   | Actinosporins C D G, fridamycins H and I                  | Elicited | [29] |
| <i>Amycolatopsis alba</i> DSM<br>44262Δabm9                 | GlcNAc                   | Carbamothioic S-acid derivative,<br>kigamicin derivatives | Elicited | [30] |
| <i>S. coelicolor</i>                                        | <u>Desferrioxamine</u> E | Streptomycin, neomycin, kanamycin                         | Enhanced | [31] |
| <b>Rare earth elements (REEs)</b>                           |                          |                                                           |          |      |

|                                                                                                                     |                   |                                                            |          |      |
|---------------------------------------------------------------------------------------------------------------------|-------------------|------------------------------------------------------------|----------|------|
| <i>S. coelicolor</i> , <i>S. antibioticus</i> and <i>S. parvulus</i> , <i>S. griseus</i> and <i>B. subtilis</i> 168 | Sc <sup>+3</sup>  | ACT, dactinomycin, actinomycin, streptomycin and bacilysin | Enhanced | [32] |
| <i>S. coelicolor</i>                                                                                                | Sc <sup>+3</sup>  | ACT                                                        | Enhanced | [32] |
| <i>Actinobacteria</i> strain 818                                                                                    | LaCl <sub>3</sub> | Urauchimycin D                                             | Elicited | [33] |
| <i>Promicromonospora kermanensis</i> DSM 45485                                                                      | La                | ACT                                                        | Enhanced | [33] |
| <b>Heavy metals</b>                                                                                                 |                   |                                                            |          |      |
| Marine <i>streptomycetes</i>                                                                                        | Ni                | Angucycline-type antibiotic                                | Elicited | [32] |
| Marine <i>Streptomyces</i> sp.                                                                                      | Co                | Enterocin                                                  | Elicited | [34] |
| <i>Actinomyces</i> species                                                                                          | NiCl <sub>2</sub> | ACT                                                        | Elicited | [35] |
| <b>Organic solvents</b>                                                                                             |                   |                                                            |          |      |
| <i>S. venezuelae</i> ATCC 10712 and <i>S. glaucescens</i> ,                                                         | Ethanol and DMSO  | Chloramphenicol and tetracenomycin C                       | Enhanced | [36] |
| <i>S. azureus</i> ATCC 14921                                                                                        | DMSO              | Thiostrepton, chloramphenicol and tetracenomycin C         | Enhanced | [36] |
| <i>S. lividans</i>                                                                                                  | DMSO              | Prodigiosin                                                | Elicited | [36] |
| <i>Promicromonospora kermanensis</i> DSM 45485                                                                      | DMSO              | ACT                                                        | Elicited | [18] |
| <i>S. venezuelae</i> ISP5230                                                                                        | Ethanol           | Jadomycin B                                                | Elicited | [37] |
| <i>S. glaucescens</i>                                                                                               | Ethanol           | Tetracenomycin C                                           | Elicited | [18] |
| <b>HITES approach</b>                                                                                               |                   |                                                            |          |      |
| <i>S. albus</i> J1074—14                                                                                            | Etoposide         | Surugamides (A, D, F, F2, F3 and G-J)                      | Enhanced | [38] |

|                                                   |                                                                  |                                                                                                                                    |          |           |
|---------------------------------------------------|------------------------------------------------------------------|------------------------------------------------------------------------------------------------------------------------------------|----------|-----------|
| <i>S. albus</i> J1074                             | Ivermectin b1a, etoposide                                        | Acyl surugamide A, albucyclones A-F, Albuquinone A                                                                                 | Elicited | [38]      |
| <i>S. albus</i> J1074                             | Etoposide                                                        | Mansouramycin C                                                                                                                    | Elicited | [39]      |
| <i>S. albus</i> J1074                             | Etoposide                                                        | Mansouramycin analog                                                                                                               | Elicited | [39]      |
| <i>Saccharopolyspora cebuensis</i>                | Procaine, furosemide, fenofibrate                                | Cebulantin                                                                                                                         | Elicited | [40]      |
| <i>S. hirosheimensis</i>                          |                                                                  | Taylorflavins A and B, pyridindolol, ,6,7,8-trimethoxy-3-methyliso-coumarin and 6,8-dihydroxy-3-methylisocoumarin and hirosheidine | Elicited | [41]      |
| <i>S. lavendulae</i> and <i>S. hirosheimensis</i> | 7,2'-dimethoxyflavone, isobutylmethylxanthine, and methoxyvone 2 | Primaquine and procaine                                                                                                            | Elicited | [42] [43] |
| <i>S. lividans</i>                                | <u>Goadsporin</u>                                                | RED                                                                                                                                | Elicited | [44]      |
| <i>Amycolatopsis. keratiniphila</i>               | Aspartame, tandutinib                                            | Baccatin III and isoscopoletin                                                                                                     | Elicited | [41]      |
| <b>Cumulative effect</b>                          |                                                                  |                                                                                                                                    |          |           |
| <i>S. tsukubaensis</i>                            | SB, DMSO and LaCl <sub>3</sub>                                   | Tacrolimus                                                                                                                         | Enhanced | [45]      |
| <b>Combinatorial engineering approach</b>         |                                                                  |                                                                                                                                    |          |           |
| <i>S. hygroscopicus</i>                           | DMSO                                                             | <u>Ascomycin</u>                                                                                                                   | Enhanced | [46]      |
| <i>S. hygroscopicus</i>                           | SB, LaCl <sub>3</sub> , and H <sub>2</sub> O <sub>2</sub>        | <u>Ascomycin</u>                                                                                                                   | Enhanced | [46]      |
| <i>S. hygroscopicus</i>                           | GlcNAc and $\gamma$ -butyrolactones                              | <u>Ascomycin</u>                                                                                                                   | Enhanced | [46]      |

## References

1. Mitova, M. I.; Lang, G.; Wiese, J.; Imhoff, J. F., Subinhibitory Concentrations of Antibiotics Induce Phenazine Production in a Marine Streptomyces sp. *Journal of natural products* **2008**, 71, (5), 824-827.
2. Amano, S.-i.; Sakurai, T.; Endo, K.; Takano, H.; Beppu, T.; Furihata, K.; Sakuda, S.; Ueda, K., A cryptic antibiotic triggered by monensin. *The Journal of antibiotics* **2011**, 64, (10), 703-703.
3. Zarins-Tutt, J. S.; Barberi, T. T.; Gao, H.; Mearns-Spragg, A.; Zhang, L.; Newman, D. J.; Goss, R. J. M., Prospecting for new bacterial metabolites: a glossary of approaches for inducing, activating and upregulating the biosynthesis of bacterial cryptic or silent natural products. *Natural product reports* **2016**, 33, (1), 54-72.
4. Tanaka, Y.; Izawa, M.; Hiraga, Y.; Misaki, Y.; Watanabe, T.; Ochi, K., Metabolic perturbation to enhance polyketide and nonribosomal peptide antibiotic production using triclosan and ribosome-targeting drugs. *Applied Microbiology and Biotechnology* **2017**, 101, (11), 4417-4431.
5. Wang, H.; Zhao, G.; Ding, X., Morphology engineering of Streptomyces coelicolor M145 by sub-inhibitory concentrations of antibiotics. *Scientific Reports* **2017**, 7, (1), 1-11.
6. Zhang, Y.; Pan, G.; Zou, Z.; Fan, K.; Yang, K.; Tan, H., JadR\*-mediated feed-forward regulation of cofactor supply in jadomycin biosynthesis. *Molecular Microbiology* **2013**, 90, (4), 884-897.
7. Wang, L.; Tian, X.; Wang, J.; Yang, H.; Fan, K.; Xu, G.; Yang, K.; Tan, H., Autoregulation of antibiotic biosynthesis by binding of the end product to an atypical response regulator. *Proceedings of the National Academy of Sciences* **2009**, 106, (21), 8617-8622.
8. Li, Y.; Li, J.; Tian, Z.; Xu, Y.; Zhang, J.; Liu, W.; Tan, H., Coordinative modulation of chlorothricin biosynthesis by binding of the glycosylated intermediates and end product to a responsive regulator ChlF1. *Journal of Biological Chemistry* **2016**, 291, (10), 5406-5417.
9. Li, J.; Li, Y.; Niu, G.; Guo, H.; Qiu, Y.; Lin, Z.; Liu, W.; Tan, H., NosP-regulated nosiheptide production responds to both peptidyl and small-molecule ligands derived from the precursor peptide. *Cell chemical biology* **2018**, 25, (2), 143-153. e4.
10. Kong, D.; Wang, X.; Nie, J.; Niu, G., Regulation of Antibiotic Production by Signaling Molecules in Streptomyces. *Frontiers in Microbiology* **2019**, 10, (2927).
11. Xiang, J.; Zhang, J.; Cai, X.; Yang, F.; Zhu, W.; Zhang, W.; Cai, M.; Yu, Z.; Li, X.; Wu, T., Bilobalide protects astrocytes from oxygen and glucose deprivation-induced oxidative injury by upregulating manganese superoxide dismutase. *Phytotherapy Research* **2019**, 33, (9), 2329-2336.
12. Jiang, M.; Yin, M.; Wu, S.; Han, X.; Ji, K.; Wen, M.; Lu, T., GdmRIII, a TetR family transcriptional regulator, controls geldanamycin and elaiophyllin biosynthesis in Streptomyces autolyticus CGMCC0516. *Scientific reports* **2017**, 7, (1), 1-11.
13. Olano, C.; Lombo, F.; Mendez, C.; Salas, J. A., Improving production of bioactive secondary metabolites in actinomycetes by metabolic engineering. *Metabolic engineering* **2008**, 10, (5), 281-292.
14. Craney, A.; Ozimok, C.; Pimentel-Elardo, S. M.; Capretta, A.; Nodwell, J. R., Chemical perturbation of secondary metabolism demonstrates important links to primary metabolism. *Chemistry & biology* **2012**, 19, (8), 1020-1027.

15. Kretschmer, A.; Dorgerloh, M.; Deeg, M.; Hagenmaier, H., The structures of novel insecticidal macrolides: bafilomycins D and E, and oxohygrolicidin. *Agricultural and biological chemistry* **1985**, 49, (8), 2509-2511.
16. Popović-Djordjević, J. B.; Klaus, A. S.; Žižak, Ž. S.; Matić, I. Z.; Drakulić, B. J., Antiproliferative and antibacterial activity of some glutarimide derivatives. *Journal of Enzyme Inhibition and Medicinal Chemistry* **2016**, 31, (6), 915-923.
17. Pimentel-Elardo, S. M.; Sørensen, D.; Ho, L.; Ziko, M.; Bueler, S. A.; Lu, S.; Tao, J.; Moser, A.; Lee, R.; Agard, D., Activity-independent discovery of secondary metabolites using chemical elicitation and cheminformatic inference. *ACS chemical biology* **2015**, 10, (11), 2616-2623.
18. Mohammadipanah, F.; Kermani, F.; Salimi, F., Awakening the Secondary Metabolite Pathways of *Promicromonospora kermanensis* Using Physicochemical and Biological Elicitors. *Applied Biochemistry and Biotechnology* **2020**, 192, (4), 1224-1237.
19. Corre, C.; Song, L.; O'Rourke, S.; Chater, K. F.; Challis, G. L., 2-Alkyl-4-hydroxymethylfuran-3-carboxylic acids, antibiotic production inducers discovered by *Streptomyces coelicolor* genome mining. *Proceedings of the National Academy of Sciences* **2008**, 105, (45), 17510-17515.
20. Gao, X.; Wang, Y.; Chu, J., A preliminary study on the impact of exogenous A-Factor analogue 1,4-butyrolactone on stimulating bitespiramycin biosynthesis. *Bioprocess and Biosystems Engineering* **2019**, 42, (12), 1903-1913.
21. Novakova, R.; Rehakova, A.; Kutas, P.; Feckova, L.; Kormanec, J., The role of two SARP family transcriptional regulators in regulation of the auricin gene cluster in *Streptomyces aureofaciens* CCM 3239. *Microbiology* **2011**, 157, (6), 1629-1639.
22. Hashimoto, K.; Nihira, T.; Sakuda, S.; Yamada, Y., IM-2, a butyrolactone autoregulator, induces production of several nucleoside antibiotics in *Streptomyces* sp. FRI-5. *Journal of fermentation and bioengineering* **1992**, 73, (6), 449-455.
23. Kitani, S.; Miyamoto, K. T.; Takamatsu, S.; Herawati, E.; Iguchi, H.; Nishitomi, K.; Uchida, M.; Nagamitsu, T.; Omura, S.; Ikeda, H., Avenolide, a *Streptomyces* hormone controlling antibiotic production in *Streptomyces avermitilis*. *Proceedings of the National Academy of Sciences* **2011**, 108, (39), 16410-16415.
24. Yang, Y.-H.; Kim, T.-W.; Park, S.-H.; Lee, K.; Park, H.-Y.; Song, E.; Joo, H.-S.; Kim, Y.-G.; Hahn, J.-S.; Kim, B.-G., Cell-free *Escherichia coli*-based system to screen for quorum-sensing molecules interacting with quorum receptor proteins of *Streptomyces coelicolor*. *Applied and environmental microbiology* **2009**, 75, (19), 6367-6372.
25. Sidda, J. D.; Poon, V.; Song, L.; Wang, W.; Yang, K.; Corre, C., Overproduction and identification of butyrolactones SCB1–8 in the antibiotic production superhost *Streptomyces* M1152. *Organic & biomolecular chemistry* **2016**, 14, (27), 6390-6393.
26. Matselyukh, B.; Mohammadipanah, F.; Laatsch, H.; Rohr, J.; Efremenkova, O.; Khilya, V., N-methylphenylalanyl-dehydrobutyrine diketopiperazine, an A-factor mimic that restores antibiotic biosynthesis and morphogenesis in *Streptomyces globisporus* 1912-B2 and *Streptomyces griseus* 1439. *The Journal of Antibiotics* **2015**, 68, (1), 9-14.
27. Meena, K. R.; Sharma, A.; Kanwar, S. S., Antitumoral and Antimicrobial Activity of Surfactin Extracted from *Bacillus subtilis* KLP2015. *International Journal of Peptide Research and Therapeutics* **2020**, 26, (1), 423-433.



28. Dashti, Y.; Grkovic, T.; Abdelmohsen, U. R.; Hentschel, U.; Quinn, R. J., Actinomycete Metabolome Induction/Suppression with N-Acetylglucosamine. *Journal of natural products* **2017**, 80, (4), 828-836.
29. Tawfike, A.; Attia, E. Z.; Desoukey, S. Y.; Hajjar, D.; Makki, A. A.; Schupp, P. J.; Edrada-Ebel, R.; Abdelmohsen, U. R., New bioactive metabolites from the elicited marine sponge-derived bacterium *Actinokineospora spheciospongiae* sp. nov. *AMB Express* **2019**, 9, (1), 12.
30. Zahran, E. M.; Abdelmohsen, U. R.; Ayoub, A. T.; Salem, M. A.; Khalil, H. E.; Desoukey, S. Y.; Fouad, M. A.; Kamel, M. S., Metabolic profiling, histopathological anti-ulcer study, molecular docking and molecular dynamics of ursolic acid isolated from *Ocimum forskolei* Benth.(family Lamiaceae). *South African Journal of Botany* **2020**, 131, 311-319.
31. Yamanaka, K.; Oikawa, H.; Ogawa, H.-o.; Hosono, K.; Shinmachi, F.; Takano, H.; Sakuda, S.; Beppu, T.; Ueda, K., Desferrioxamine E produced by *Streptomyces griseus* stimulates growth and development of *Streptomyces tanashiensis*. *Microbiology* **2005**, 151, (9), 2899-2905.
32. Abdelmohsen, U. R.; Grkovic, T.; Balasubramanian, S.; Kamel, M. S.; Quinn, R. J.; Hentschel, U., Elicitation of secondary metabolism in actinomycetes. *Biotechnology advances* **2015**, 33, (6), 798-811.
33. Xu, D.; Han, L.; Li, C.; Cao, Q.; Zhu, D.; Barrett, N. H.; Harmody, D.; Chen, J.; Zhu, H.; McCarthy, P. J., Bioprospecting deep-sea actinobacteria for novel anti-infective natural products. *Frontiers in microbiology* **2018**, 9, 787.
34. Hassan, S. S.; Shah, S. A. A.; Pan, C.; Fu, L.; Cao, X.; Shi, Y.; Wu, X.; Wang, K.; Wu, B., Production of an antibiotic enterocin from a marine actinobacteria strain H1003 by metal-stress technique with enhanced enrichment using response surface methodology. *Pak. J. Pharm. Sci* **2017**, 30, (1), 313-324.
35. Haferburg, G.; Groth, I.; Möllmann, U.; Kothe, E.; Sattler, I., Arousing sleeping genes: shifts in secondary metabolism of metal tolerant actinobacteria under conditions of heavy metal stress. *Biometals* **2009**, 22, (2), 225.
36. Chen, G.; Li, X.; Waters, B.; Davies, J., Enhanced production of microbial metabolites in the presence of dimethyl sulfoxide. *The Journal of antibiotics* **2000**, 53, (10), 1145-1153.
37. Pettit, R. K., Small-molecule elicitation of microbial secondary metabolites. *Microbial biotechnology* **2011**, 4, (4), 471-478.
38. Li, X.; Wu, Y.; Zhang, W.; Gong, J.; Cheng, Y., Pre-conditioning with tanshinone IIA attenuates the ischemia/reperfusion injury caused by liver grafts via regulation of HMGB1 in rat Kupffer cells. *Biomedicine & Pharmacotherapy* **2017**, 89, 1392-1400.
39. Seyedsayamdost, M. R., Toward a global picture of bacterial secondary metabolism. *Journal of industrial microbiology & biotechnology* **2019**, 46, (3-4), 301-311.
40. Moon, K.; Xu, F.; Seyedsayamdost, M. R., Cebulantin, a Cryptic Lanthipeptide Antibiotic Uncovered Using Bioactivity-Coupled HiTES. *Angewandte Chemie* **2019**, 131, (18), 6034-6038.
41. Moon, K.; Xu, F.; Zhang, C.; Seyedsayamdost, M. R., Bioactivity-HiTES unveils cryptic antibiotics encoded in actinomycete bacteria. *ACS chemical biology* **2019**, 14, (4), 767-774.

42. Camarda, G.; Jirawatcharadech, P.; Priestley, R. S.; Saif, A.; March, S.; Wong, M. H. L.; Leung, S.; Miller, A. B.; Baker, D. A.; Alano, P.; Paine, M. J. I.; Bhatia, S. N.; O'Neill, P. M.; Ward, S. A.; Biagini, G. A., Antimalarial activity of primaquine operates via a two-step biochemical relay. *Nature Communications* **2019**, 10, (1), 3226.
43. Schmidt, R. M.; Rosenkranz, H. S., Antimicrobial activity of local anesthetics: lidocaine and procaine. *The Journal of infectious diseases* **1970**, 597-607.
44. Onaka, H., Novel antibiotic screening methods to awaken silent or cryptic secondary metabolic pathways in actinomycetes. *The Journal of antibiotics* **2017**, 70, (8), 865-870.
45. Kelly, P. A.; Burckart, G. J.; Venkataramanan, R., Tacrolimus: a new immunosuppressive agent. *American journal of health-system pharmacy : AJHP : official journal of the American Society of Health-System Pharmacists* **1995**, 52, (14), 1521-35.
46. Wang, C.; Wang, J.; Yuan, J.; Jiang, L.; Jiang, X.; Yang, B.; Zhao, G.; Liu, B.; Huang, D., Generation of *Streptomyces hygrosopicus* cell factories with enhanced ascomycin production by combined elicitation and pathway-engineering strategies. *Biotechnology and bioengineering* **2019**, 116, (12), 3382-3395.
